# Supplementary material for: Association between Plasma HMGB-1 and Silicosis: A Case-Control Study
Source: MDPI journal article supplement (doi:10.3390/ijms19124043), 2018-12-14
Supplement: s1 [file s1]

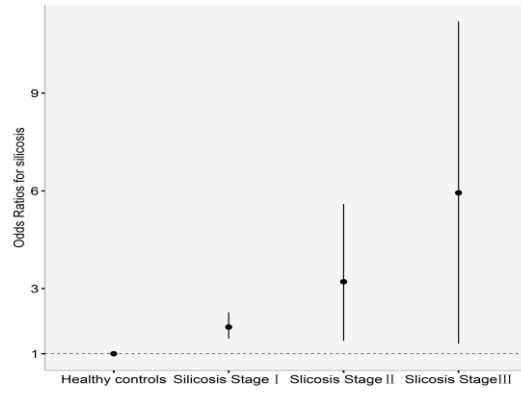

**Figure S1** The relationships between HMGB-1 and the stage of silicosis. Model adjusted for age (continuous), BMI (continuous), smoking status (no, yes), drinking status (no, yes), passive smoker (no, yes).
